# Supplementary material for: Renewable sources from plants as the starting material for designing new terpene chiral ionic liquids used for the chromatographic separation of acidic enantiomers
Source: Royal Society of Chemistry journal article supplement (doi:10.1039/c7ra03310a), 2017-01-01
Supplement: c7ra03310a1.pdf [file c7ra03310a1.pdf]

Electronic supplementary information

RSC Advances

**Renewable sources from the plants as the starting material for designing new  
terpene chiral ionic liquids used for the chromatographic separation of acidic  
enantiomers**

Joanna Feder-Kubis,<sup>\*a</sup> Jolanta Flieger,<sup>b</sup> Małgorzata Tatarczak-Michalewska,<sup>b</sup> Anita Płazińska,<sup>c</sup>  
Anna Madejska<sup>b</sup> and Marta Swatko-Ossor<sup>d</sup>

<sup>a</sup> *Faculty of Chemistry, Wrocław University of Science and Technology, 50-370 Wrocław, Poland. E-mail:*

*joanna.feder-kubis@pwr.edu.pl*

<sup>b</sup> *Department of Analytical Chemistry, Medical University of Lublin, 20-093 Lublin, Poland*

<sup>c</sup> *Department of Biopharmacy, Medical University of Lublin, -093 Lublin, Poland*

<sup>d</sup> *Department of Biochemistry and Biotechnology, Medical University of Lublin, 20-093 Lublin, Poland*

- |    |                                                                                                             |        |
|----|-------------------------------------------------------------------------------------------------------------|--------|
| 1. | NMR and HRMS spectra of the discussed CILs                                                                  | S2-S13 |
| 2. | Fig. S1 The scheme of the interactions between <i>R</i> -4-hydroxy-3-methoxy mandelic acid and teicoplanin. | S14    |
| 3. | Fig. S2 The teicoplanin – <b>2c</b> CIL complex.                                                            | S15    |

NMR spectra of the discussed CILs in CDCl<sub>3</sub>

A)

1-[(1*S*)-endo(-)-Borneoxymethyl]-3-methylimidazolium chloride [C<sub>1</sub>-Im-CH<sub>2</sub>O-Bor][Cl] (**1b**)

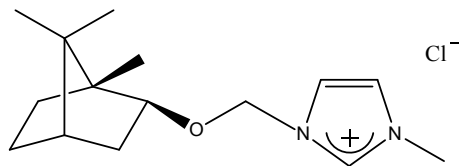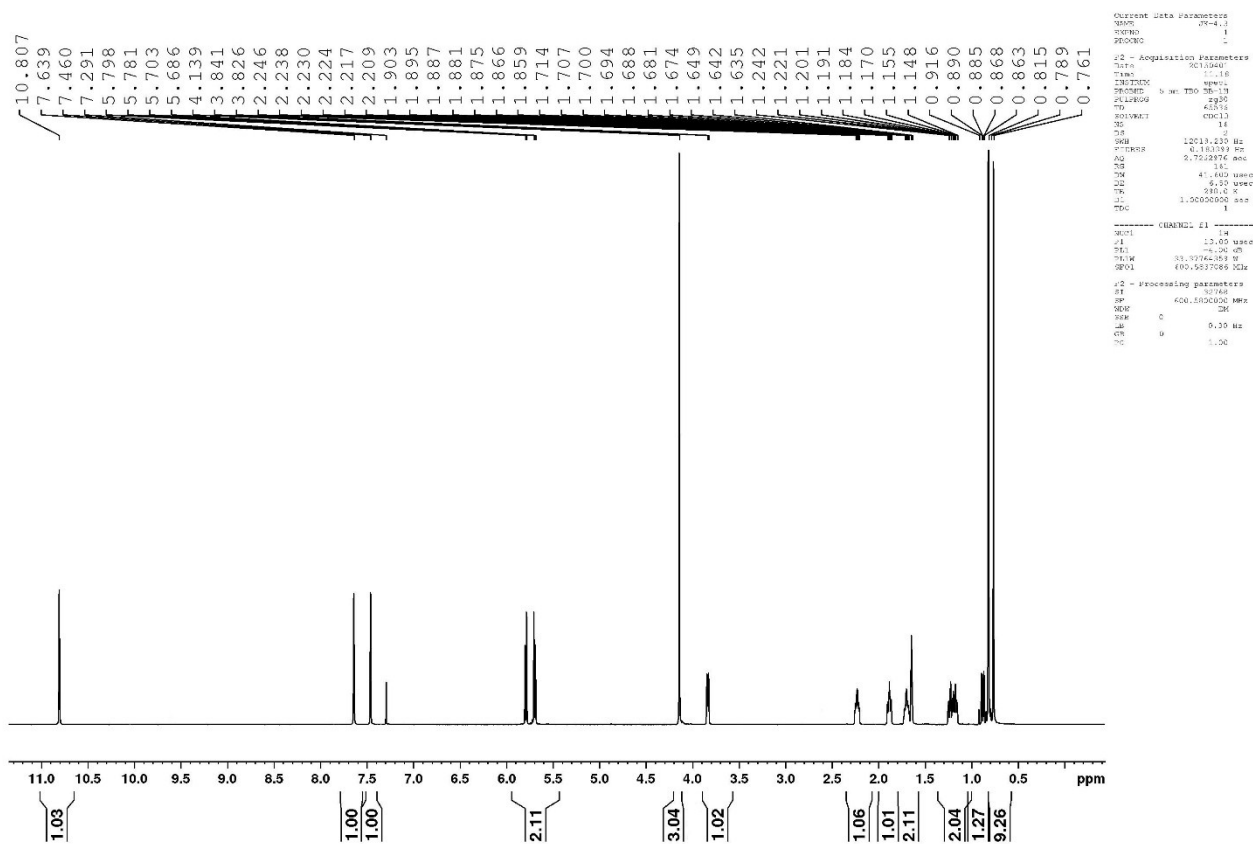

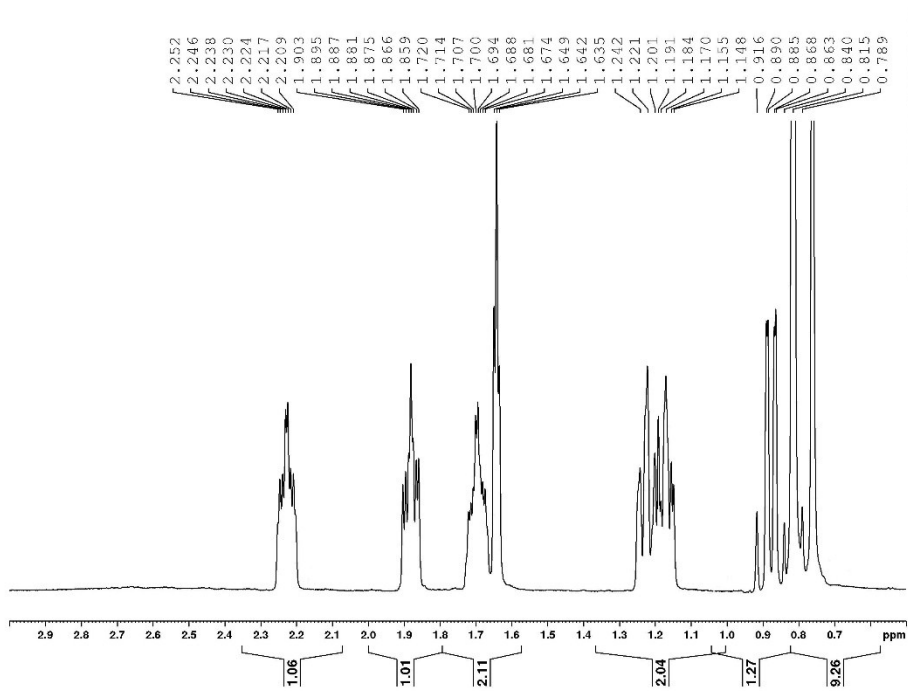

Current Data Parameters  
 F2 - Acquisition Parameters  
 Date\_ 2012-09-13  
 Time\_ 11:30  
 Experiment\_ 13070901  
 F2 - Acquisition Parameters  
 Date\_ 2012-09-13  
 Time\_ 11:30  
 Experiment\_ 13070901  
 F2 - Acquisition Parameters  
 Date\_ 2012-09-13  
 Time\_ 11:30  
 Experiment\_ 13070901  
 F2 - Acquisition Parameters  
 Date\_ 2012-09-13  
 Time\_ 11:30  
 Experiment\_ 13070901  
 F2 - Acquisition Parameters  
 Date\_ 2012-09-13  
 Time\_ 11:30  
 Experiment\_ 13070901  
 F2 - Acquisition Parameters  
 Date\_ 2012-09-13  
 Time\_ 11:30  
 Experiment\_ 13070901

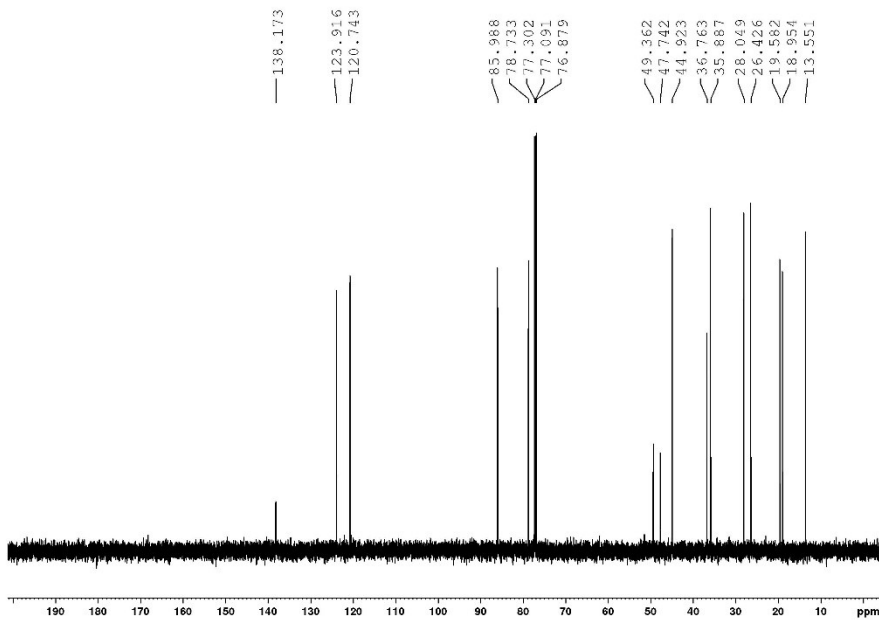

Current Data Parameters  
 F2 - Acquisition Parameters  
 Date\_ 2012-09-13  
 Time\_ 11:30  
 Experiment\_ 13070901  
 F2 - Acquisition Parameters  
 Date\_ 2012-09-13  
 Time\_ 11:30  
 Experiment\_ 13070901  
 F2 - Acquisition Parameters  
 Date\_ 2012-09-13  
 Time\_ 11:30  
 Experiment\_ 13070901  
 F2 - Acquisition Parameters  
 Date\_ 2012-09-13  
 Time\_ 11:30  
 Experiment\_ 13070901  
 F2 - Acquisition Parameters  
 Date\_ 2012-09-13  
 Time\_ 11:30  
 Experiment\_ 13070901  
 F2 - Acquisition Parameters  
 Date\_ 2012-09-13  
 Time\_ 11:30  
 Experiment\_ 13070901

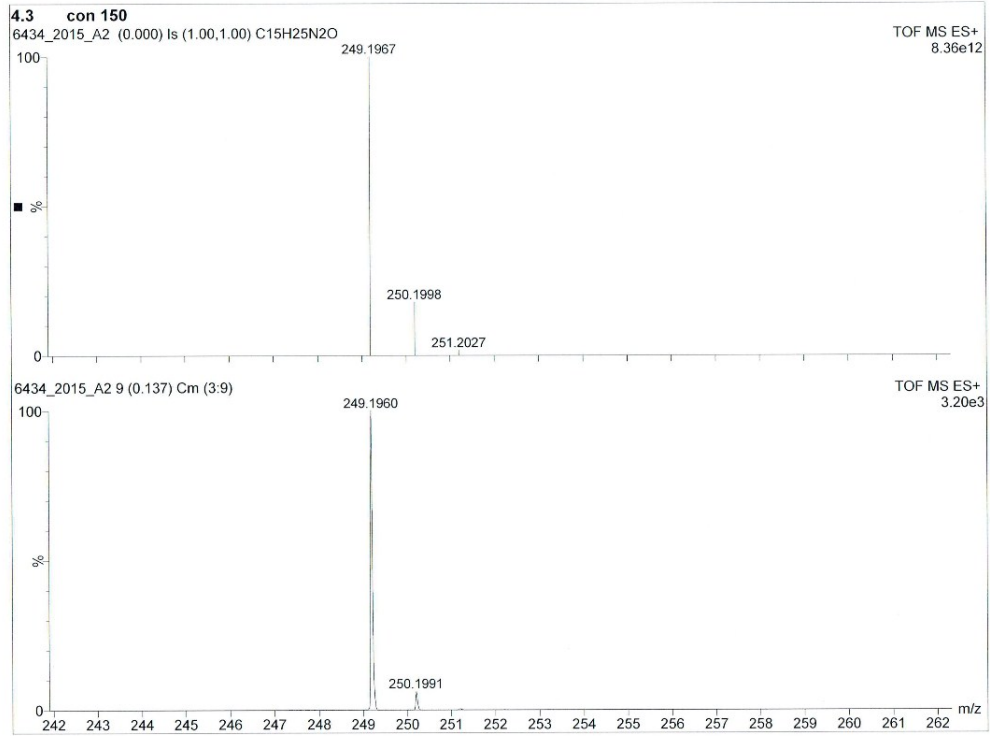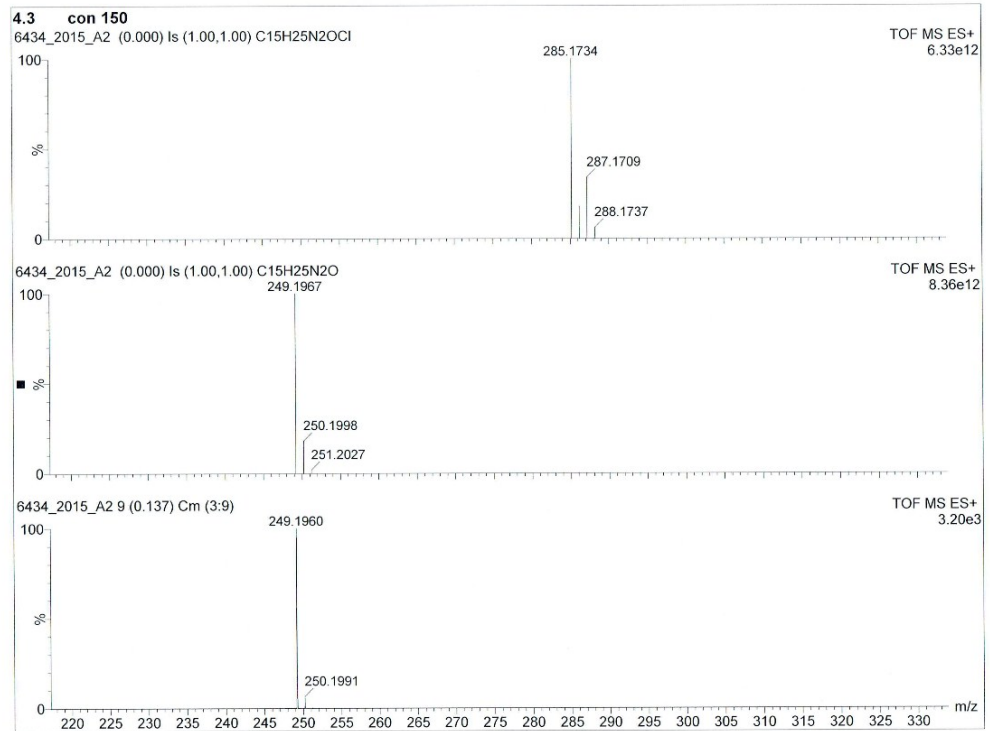

B)

1-[(1*S*)-endo(-)-Borneoxymethyl]-3-pentylimidazolium chloride [*C*<sub>5</sub>-Im-CH<sub>2</sub>O-Bor][Cl] (**1c**)

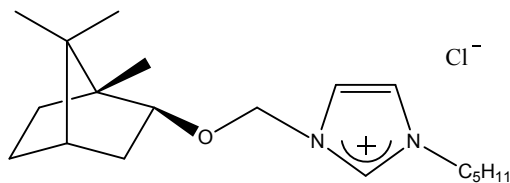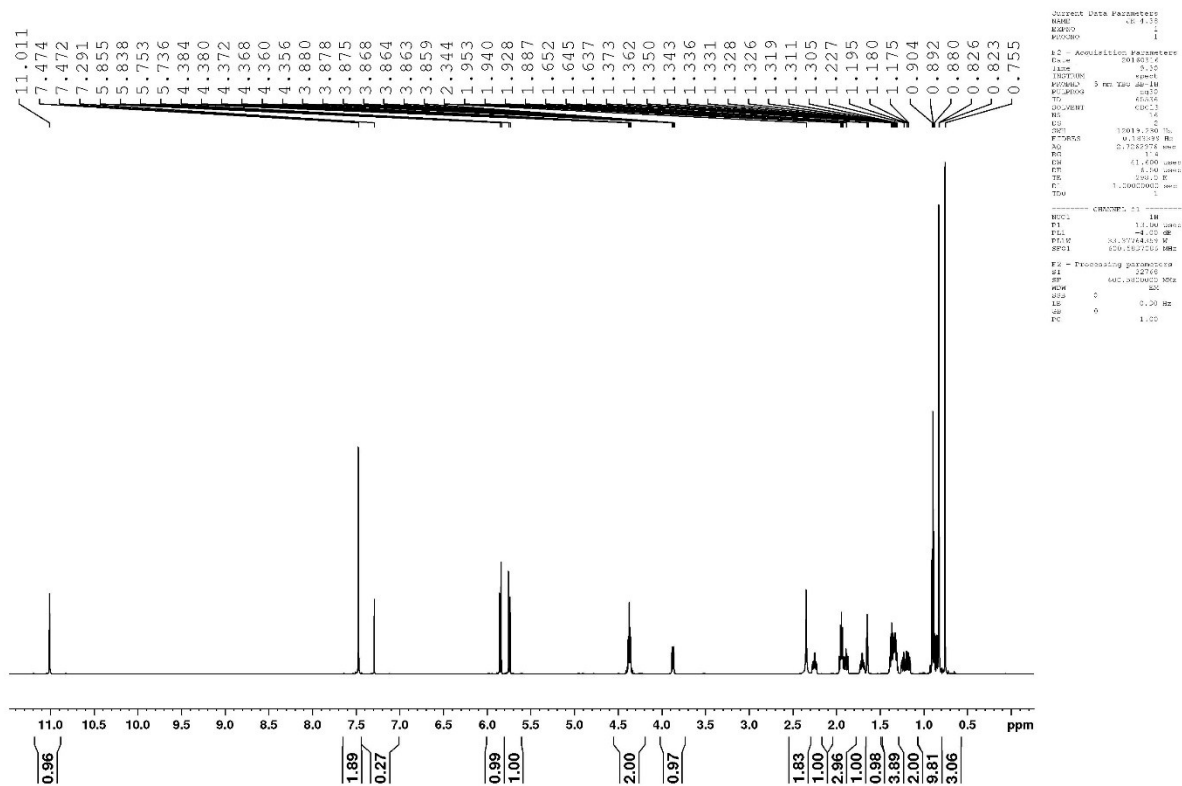

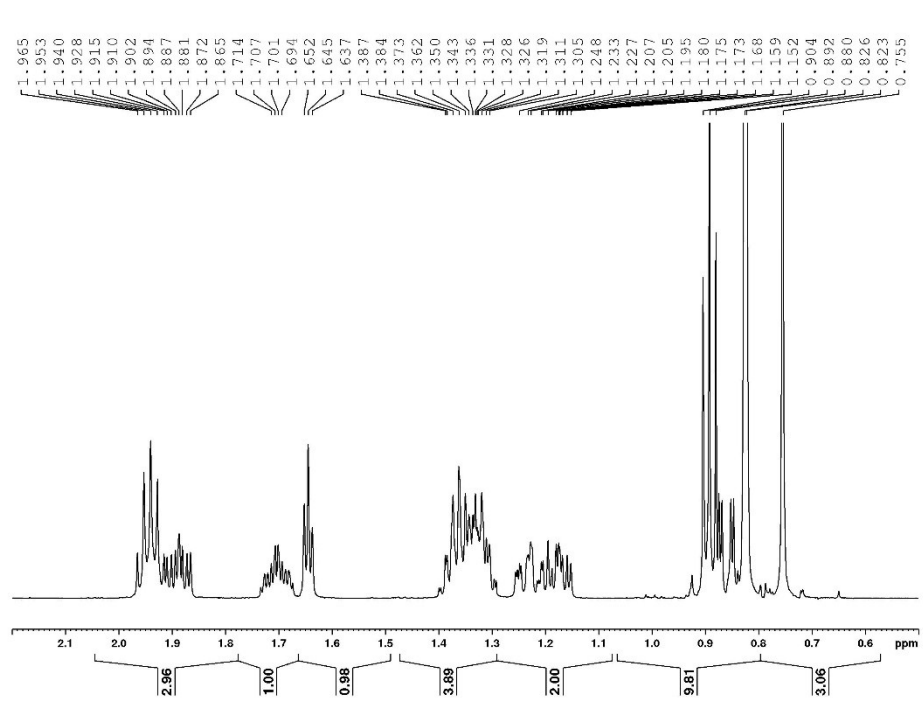

Current Data Parameters  
 Name: 13C  
 Date: 20100114  
 Time: 16:28  
 File: 13C.D  
 F2 - Acquisition Parameters  
 Date\_ : 20100114  
 Time\_ : 16:28  
 File\_ : 13C.D  
 F2 - Processing parameters  
 SI : 32768  
 SF : 125.760 MHz  
 AQ : 0.50000000 sec  
 RG : 655.360  
 GB : 3.00000000 sec  
 PC : 0.00000000 sec  
 LB : 0.30000000 Hz  
 GB : 0.00000000 Hz  
 CB : 0.00000000 Hz

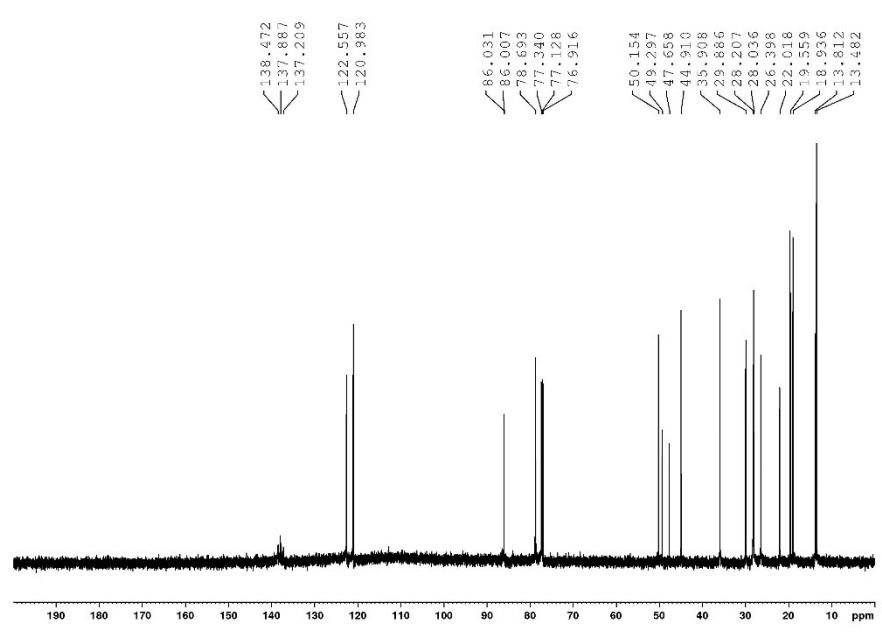

Current Data Parameters  
 Name: 13C  
 Date: 20100114  
 Time: 16:28  
 File: 13C.D  
 F2 - Acquisition Parameters  
 Date\_ : 20100114  
 Time\_ : 16:28  
 File\_ : 13C.D  
 F2 - Processing parameters  
 SI : 32768  
 SF : 125.760 MHz  
 AQ : 0.50000000 sec  
 RG : 655.360  
 GB : 3.00000000 sec  
 PC : 0.00000000 sec  
 LB : 0.30000000 Hz  
 GB : 0.00000000 Hz  
 CB : 0.00000000 Hz

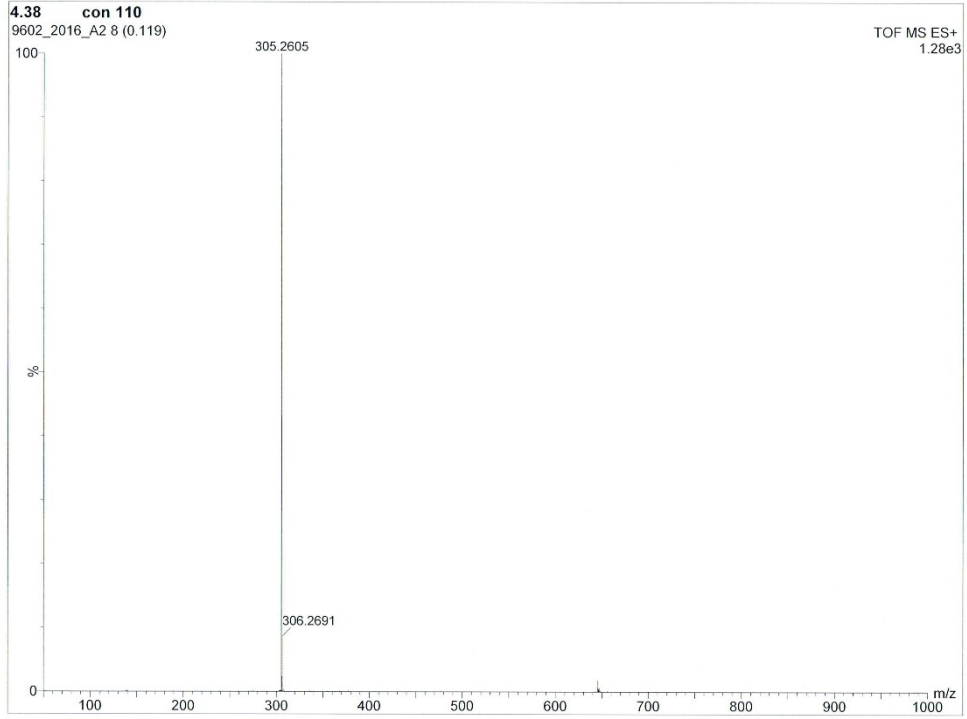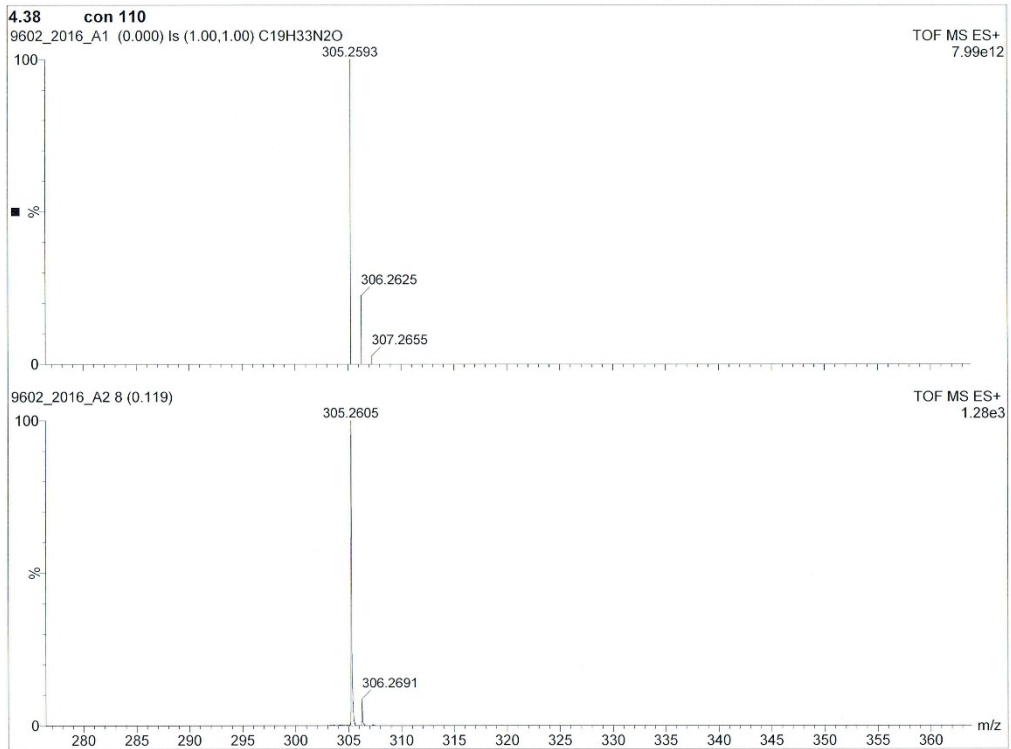

C)

1-[(1*R*)-endo-(+)-Fenchoxymethyl]-3-methylimidazolium chloride [C<sub>1</sub>-Im-CH<sub>2</sub>O-Fen][Cl] (**2b**)

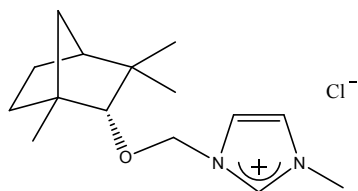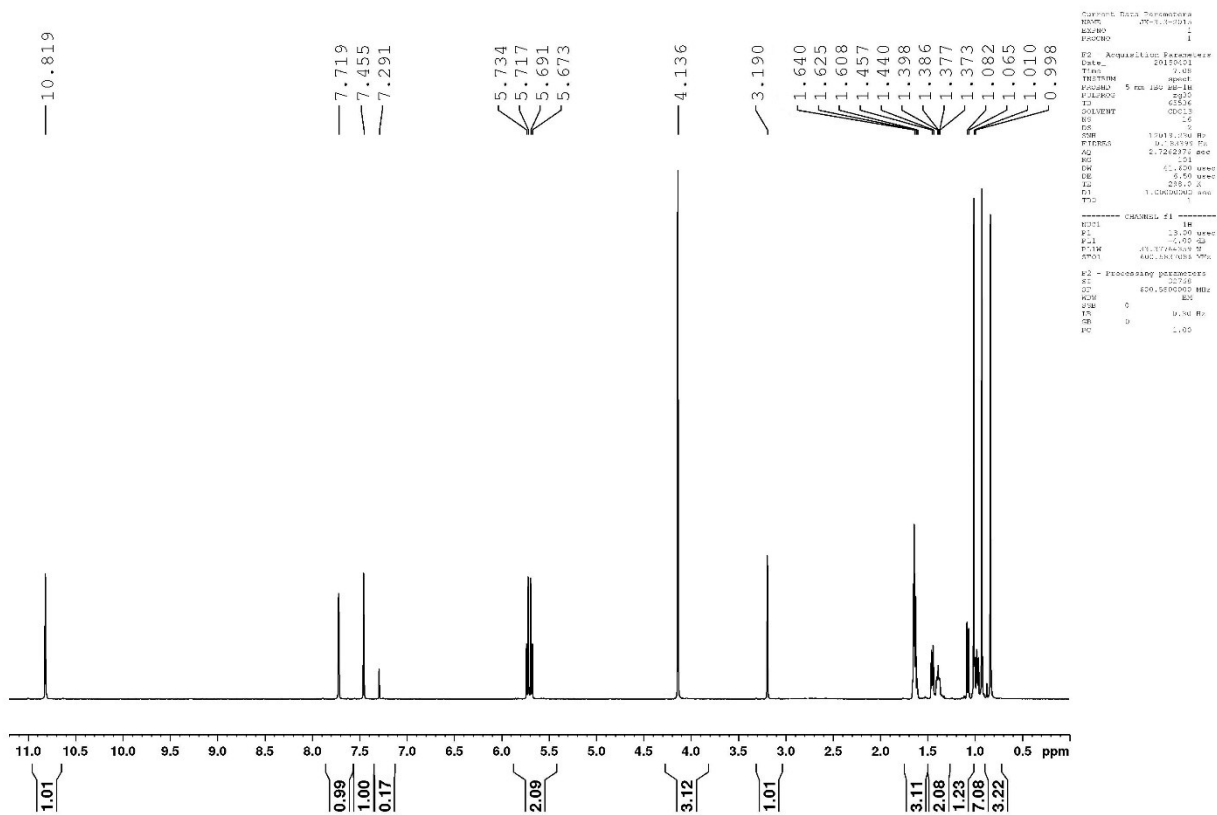





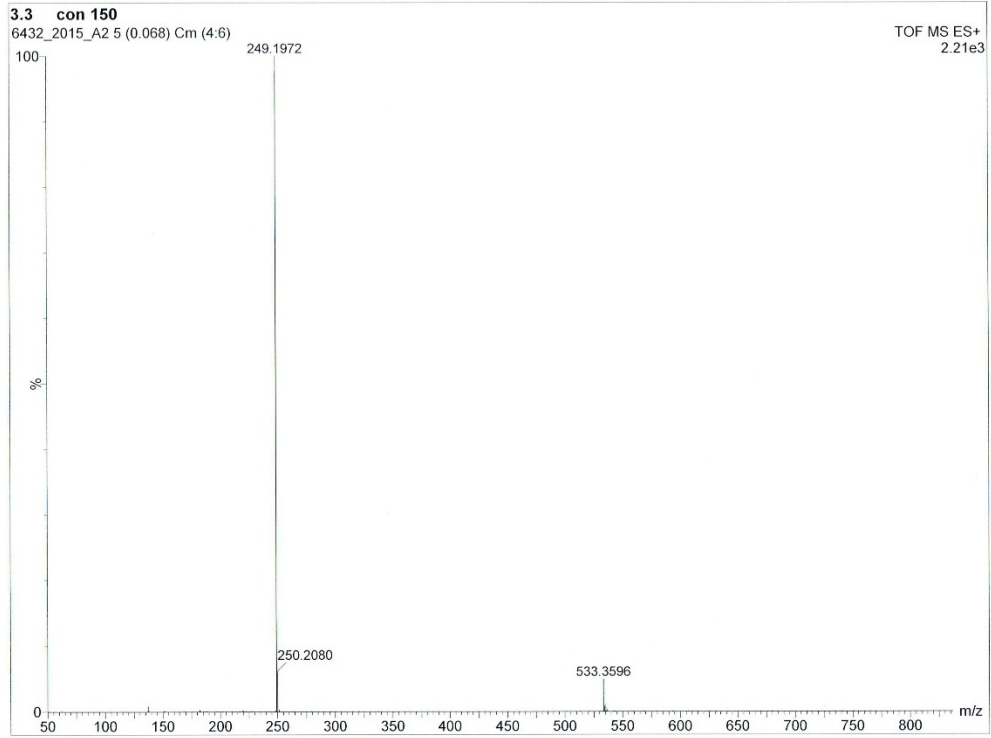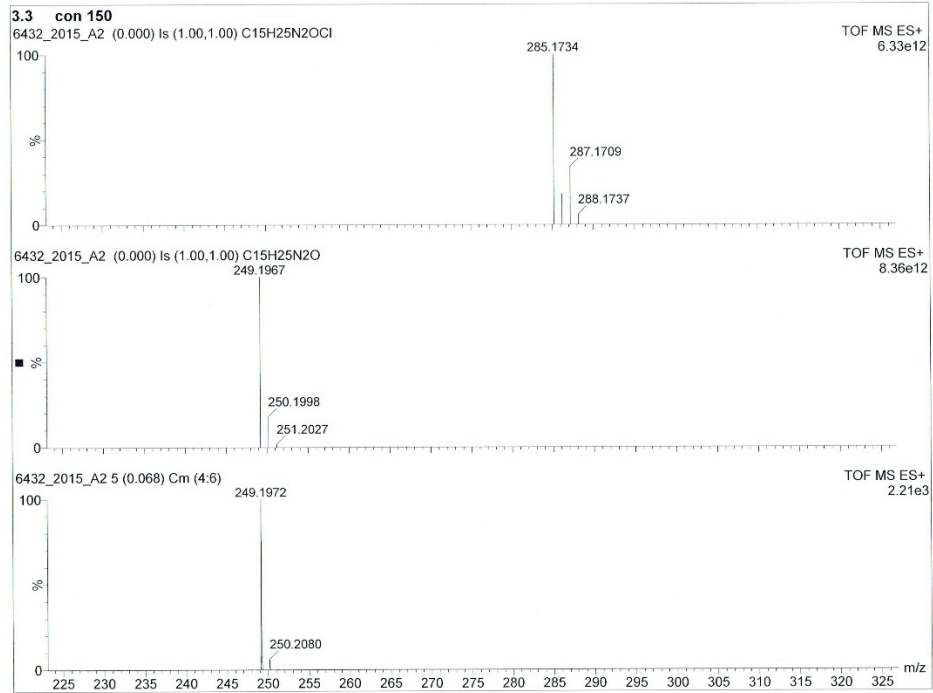

D)

1-[(1*R*)-endo-(+)-Fenchoxymethyl]-3-pentylimidazolium chloride [C<sub>5</sub>-Im-CH<sub>2</sub>O-Fen][Cl] (**2c**)

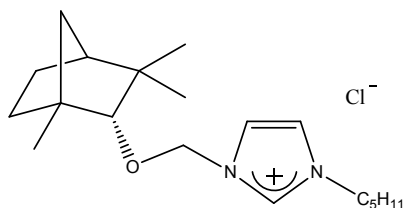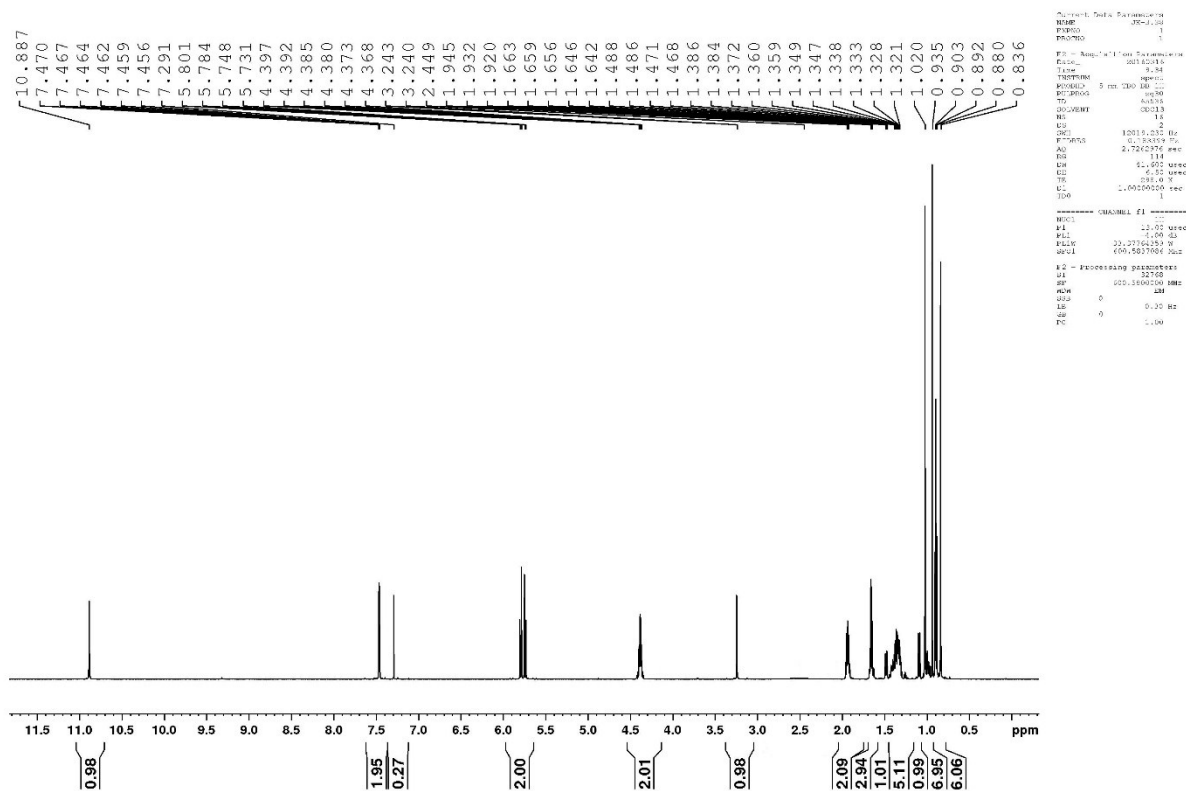

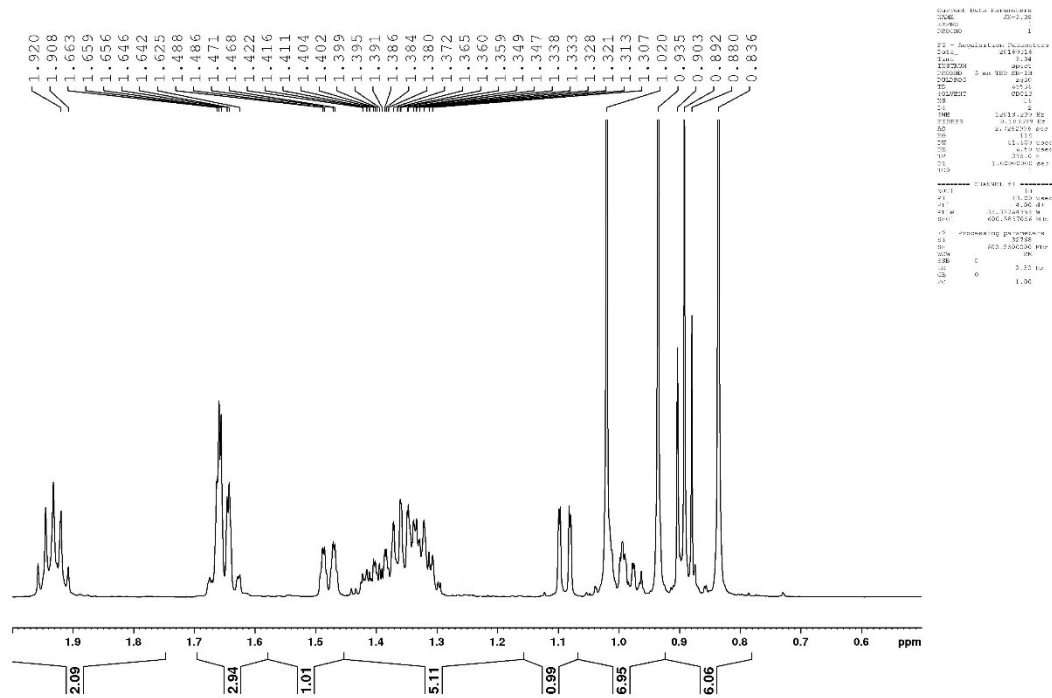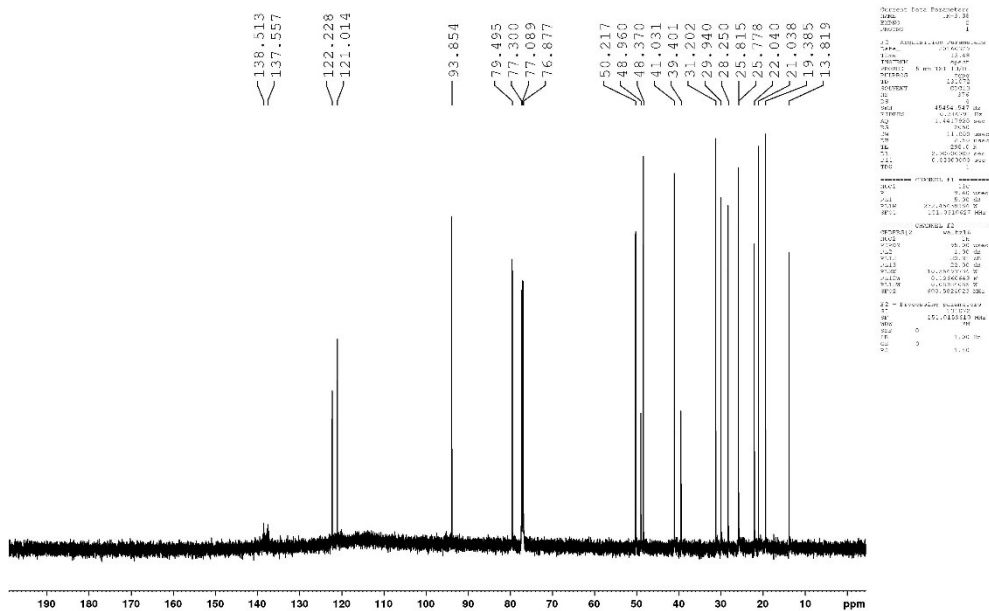

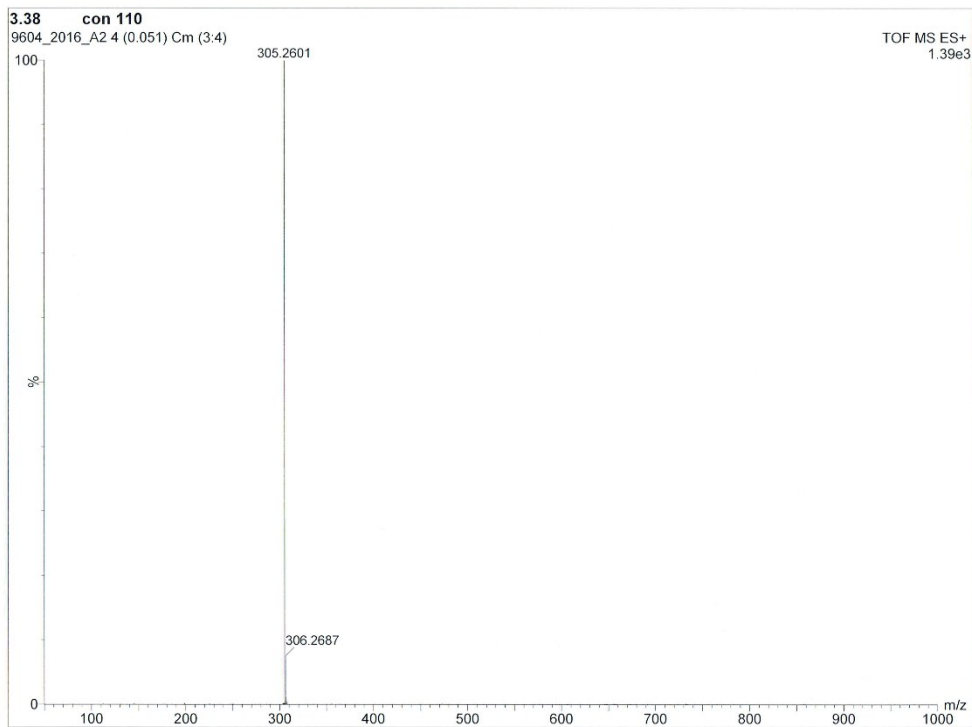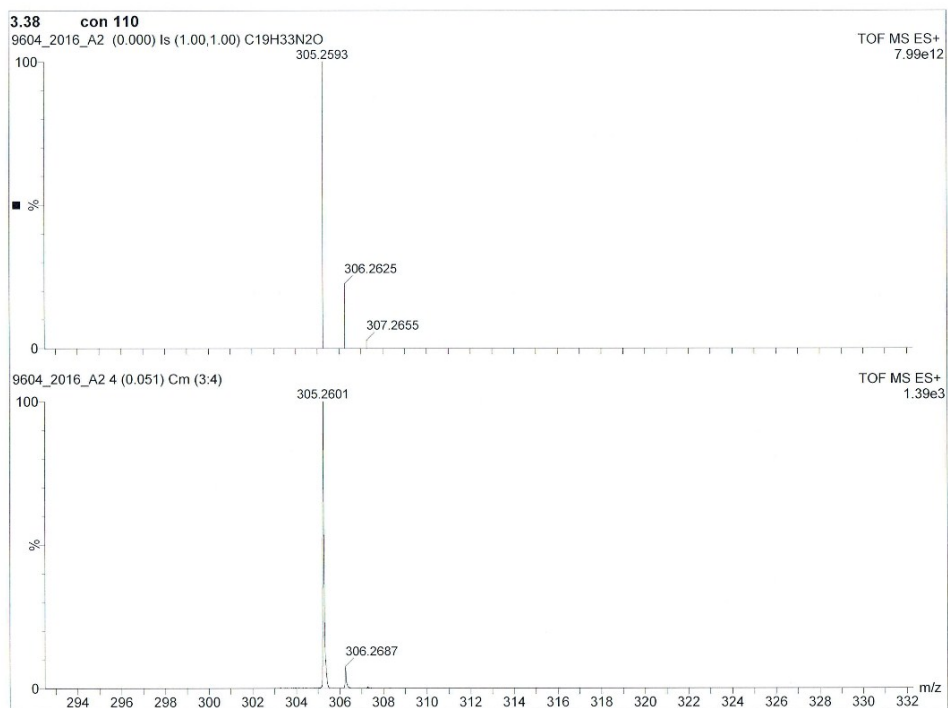

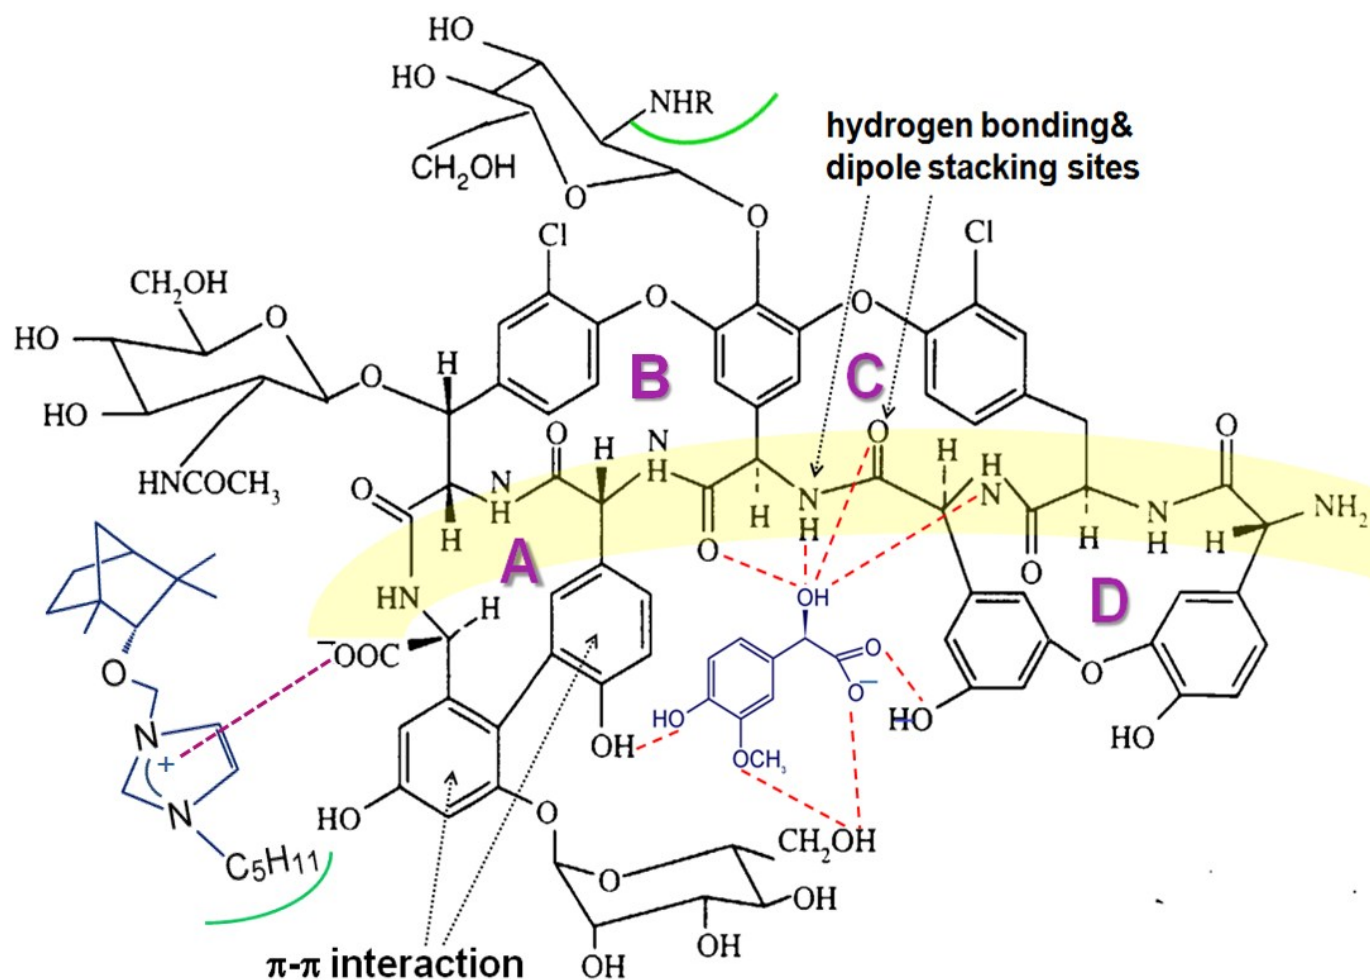

Fig. S1 The scheme of the interactions between *R*-4-hydroxy-3-methoxy mandelic acid and teicoplanin. The *R*-enantiomer binds simultaneously to cavities A, C and D. Red dashed lines indicate the possibility of creating hydrogen bonds. Purple dashed line indicates the ionic bridge created between carboxyl group of teicoplanin and the imidazolium moiety of terpene CIL. Green solid line shows hydrophobic interactions between the alkyl group (pentyl) of **1b** CIL and the aliphatic decanoic chain of teicoplanin (R).

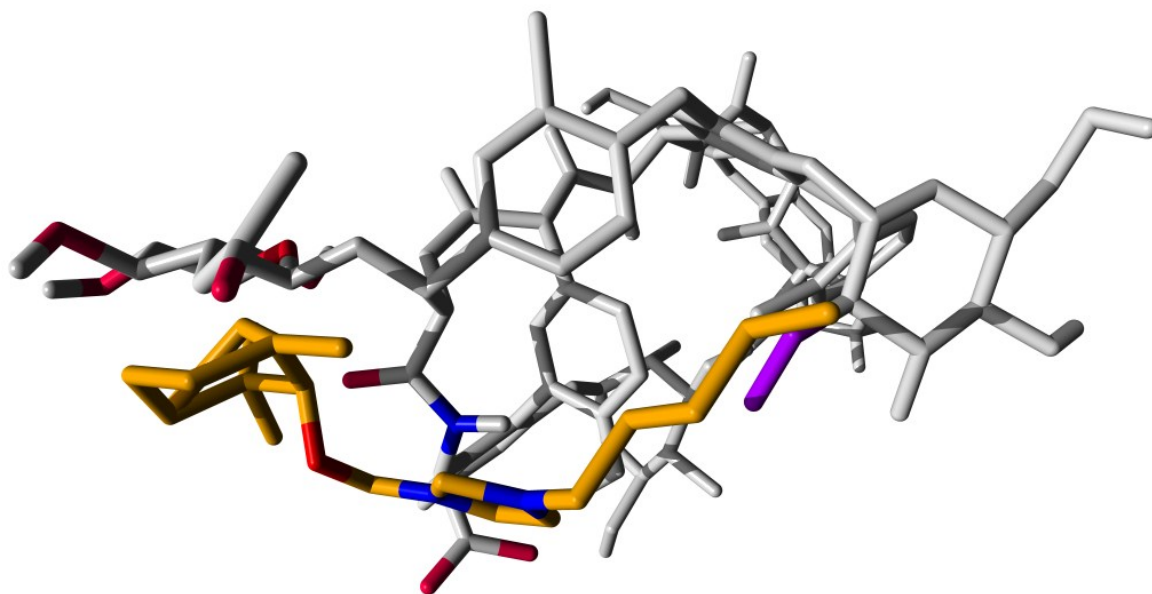

Fig. S2 The teicoplanin – **2c** CIL complex. The decanoic chain (purple) was shorten for clarity. The **2c** CIL was colored in orange.
